# Supplementary material for: Neoadjuvant immunotherapy for non-small cell lung cancer: right drugs, right patient, right time?
Source: PubMed Central journal article supplement — J Immunother Cancer. 2021 Jun 3;9(6):e002248. doi: 10.1136/jitc-2020-002248 (PMC8183290; doi:10.1136/jitc-2020-002248), 2021-06-03
Supplement: jitc-2020-002248supp001.pdf [file jitc-2020-002248supp001.pdf]

## SUPPLEMENTARY TABLES

| <b>Trial name/identifier</b> | <b>Trial design</b>                                          | <b>Neoadjuvant trial intervention</b>             | <b>Primary endpoint(s)</b>                                             |
|------------------------------|--------------------------------------------------------------|---------------------------------------------------|------------------------------------------------------------------------|
| NEOMUN,<br>NCT03197467       | Phase 2, single-arm, n=30<br>Stage 2-3A                      | Pembrolizumab (2 cycles)                          | Safety, feasibility, tumour response (RECIST, PET and Junker criteria) |
| PRINCEPS,<br>NCT02994576     | Phase 2, single-arm, n=60<br>Stage 1B-3A (non-N2)            | Atezolizumab (1 cycle)                            | Rate free of major toxicities or morbidities                           |
| NCT03732664                  | Phase 1, single arm, n=40<br>Stage 1A-3A                     | Nivolumab (3 cycles)                              | Safety and AE rate                                                     |
| IoNESCO,<br>NCT03030131      | Phase 2, single arm, n=81<br>Stage 1B-2B                     | Durvalumab (3 cycles)                             | R0 resection rate                                                      |
| TOP 1501,<br>NCT02818920     | Phase 2, single-arm, n=35<br>Stage 1B-3A                     | Pembrolizumab (2 cycles) + adjuvant pembrolizumab | Surgical feasibility rate                                              |
| NEOpredict,<br>NCT04205552   | Phase 2, two-arm, randomized, open-label, n=60<br>Stage 1-3A | Nivolumab ± relatlimab (2 cycles)                 | Feasibility                                                            |
| POPCORN,<br>ACTRN            | Phase 1B/2, two-arm,                                         | Nivolumab ± denosumab (2 cycles)                  | Pharmacodynamic correlates of                                          |

|                          |                                                                                                     |                                                                                                                              |                       |
|--------------------------|-----------------------------------------------------------------------------------------------------|------------------------------------------------------------------------------------------------------------------------------|-----------------------|
| 12618001121257           | randomized,<br>open-label, n=30<br>Stage 1-3A                                                       |                                                                                                                              | neoadjuvant therapy   |
| NADIM-II,<br>NCT03838159 | Phase 2, two-<br>arm,<br>randomized,<br>open-label, n=90<br>Potentially<br>resectable stage<br>3A-B | Platinum-doublet NACT ±<br>neoadjuvant/adjuvant nivolumab                                                                    | pCR                   |
| NCT03081689              | Phase 2, single-<br>arm, n=46<br>Stage 3A (N2)                                                      | Platinum-doublet NACT +<br>neoadjuvant/adjuvant nivolumab<br>(1 neoadjuvant cycle)                                           | PFS                   |
| NCT02572843              | Phase 2, single<br>arm, n=68<br>Stage 3A (N2)                                                       | Platinum-doublet NACT +<br>neoadjuvant/adjuvant<br>durvalumab<br>(2 neoadjuvant cycles)                                      | EFS                   |
| NCT03237377              | Phase 2, single-<br>arm, n=32<br>Stage 3A                                                           | Durvalumab + thoracic RT<br>(2 cycles, 45Gy)<br>Possibility of tremelimumab<br>expansion arm                                 | Toxicity, feasibility |
| NCT03871153              | Phase 2, single<br>arm, n=25<br>Stage 3 (N2)                                                        | Chemoimmunoradio-therapy<br>(platinum doublet + durvalumab<br>+ thoracic RT) (3 cycles, 45-<br>61.2Gy) + adjuvant durvalumab | pCR                   |

**Supplementary Table 1. Ongoing phase 1-2 trials employing neoadjuvant immunotherapy in non-small cell lung cancer. NACT (neoadjuvant chemotherapy), RT**

(radiotherapy), Gy (Gray), RECIST (Response Evaluation Criteria in Solid Tumors), PET (positron-emission tomography), AE (adverse events), pCR (pathological complete response), PFS (progression-free survival), EFS (event-free survival).

| <b>Trial name/identifier</b>      | <b>Trial design</b>                                   | <b>Adjuvant trial intervention</b>                                                                                                                                                      | <b>Primary endpoint(s)</b>                                                                                                         |
|-----------------------------------|-------------------------------------------------------|-----------------------------------------------------------------------------------------------------------------------------------------------------------------------------------------|------------------------------------------------------------------------------------------------------------------------------------|
| BR.31, NCT02273375                | Phase 3, two-arm, randomized, double-blinded, n=1,360 | Durvalumab vs placebo for up to 12 months in addition to standard-of-care adjuvant chemotherapy and/or radiotherapy in patients with resected stage 1B (primary $\geq$ 4cm) – 3A NSCLC  | DFS in PD-L1 positive patients, DFS in all patients                                                                                |
| PEARLS (KEYNOTE-091), NCT02504372 | Phase 3, two-arm, randomized, double-blinded, n=1,080 | Pembrolizumab vs placebo for up to 12 months in patients with resected stage 1B (primary $\geq$ 4cm) – 3A NSCLC                                                                         | DFS                                                                                                                                |
| IMpower010, NCT02486718           | Phase 3, two-arm, randomized, open-label, n=1,280     | Atezolizumab in intervention group for up to 12 months following completion of adjuvant cisplatin-based chemotherapy in patients with resected stage 1B (primary $\geq$ 4cm) – 3A NSCLC | DFS in PD-L1-selected populations within various subgroups (stage 2-3A subpopulation, stage 2-3A participants, and ITT population) |
| ANVIL, NCT02595944                | Phase 3, two-arm, randomized, open-label, n=903       | Nivolumab in intervention group for up to 12 months following completion of any adjuvant chemotherapy or radiotherapy in patients with resected stage 1B                                | DFS and OS, each stratified by PD-L1 expression                                                                                    |

|  |  |                                                                                                                        |  |
|--|--|------------------------------------------------------------------------------------------------------------------------|--|
|  |  | (primary $\geq$ 4cm) – 3A NSCLC not harbouring EGFR mutations (exon 19 deletion or exon 21 L858R) or ALK rearrangement |  |
|--|--|------------------------------------------------------------------------------------------------------------------------|--|

**Supplementary Table 2. Phase 3 trials of adjuvant immunotherapy in resected non-small cell lung cancer (NSCLC).** Note: in all trials, UICC version 7 staging was used, where stage 3A would now correlate with 3B in the case of pT3N2M0 disease, although these patients were still included. DFS, disease-free survival; PD-L1, programmed death-1-ligand 1; OS, overall survival; EGFR, epithelial growth factor receptor; ALK, anaplastic lymphoma kinase.
